# Supplementary material
Source: Springer Nature journal article supplement (https://www.springermedizin.de/resource/supplementary/12943_2013_1250_MOESM6_ESM.pdf/9553056)
Supplement: MOESM6 [file 9553056]

## Additional file 6

Knowdown efficiency for the double-knockdown and triple-knockdown in BRCA1-mutated breast cancer cells

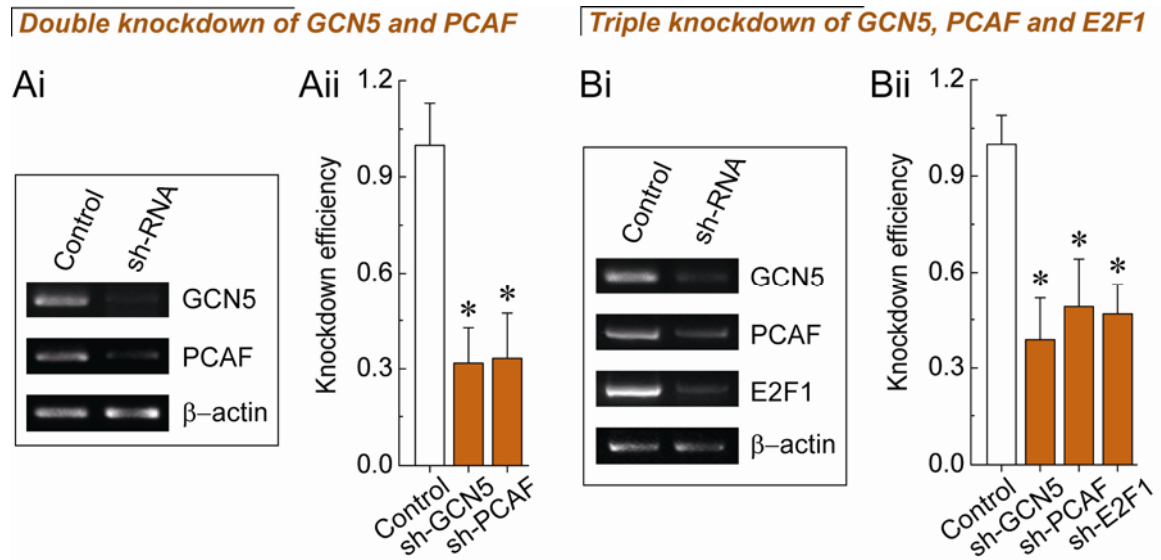

Ai and Bi, RT-PCR showing GCN5, PCAF and E2F1 levels before and after knockdown by shRNAs, and normalized to  $\beta$ -actin expression. Aii and Bii, the results from three independent experiments are represented as mean  $\pm$  SD.
